# Supplementary material for: Natural xanthones as α-Mangostin induce vasorelaxation involving key gating residues in the S6 domain of BK channels
Source: eLife. 2026 May 6;14:RP109479. doi: 10.7554/eLife.109479 (PMC13148824; doi:10.7554/eLife.109479)
Supplement: Source data 1. [file elife-109479-data1.docx]

**Source data file 1:** Summary of data used in figures and applied statistical tests with p-values.

**to**

**Natural xanthones as α-Mangostin induce vasorelaxation involving key gating residues in the S6 domain of BK channels**

Sönke Cordeiro1, Robert Patejdl2, Thomas Baukrowitz1, Marianne Musinszki1*

*1 Institute of Physiology, Christian-Albrechts-University Kiel, Germany
2 Department of Human Medicine, Health and Medical University Erfurt, Germany*

** for correspondence: m.musinszki@physiologie.uni-kiel.de*

Tables S1 - S16

Table S1: Modulation of different K+ Channels by α -Mangostin shown by current fold change ± SEM. To test for statistical significance of activation or inhibition, relative currents before and after α-Mangostin application (10 µM) were compared with multiple t-tests with the Holm-Sidak correction for multiple comparisons (α=0.05).

| Fig. 1A/S1 | Channel | Fold Change (I/I0) at +40 mV | Adjusted P value |
| --- | --- | --- | --- |
|  | TREK-1 | 10.3 ± 1.64 | <0.001 |
|  | TALK-1 | 0.9 ± 0.04 | 0.15 |
|  | TRESK | 0.51 ± 0.12 | 0.009 |
|  | TWIK-1m | 0.12 ± 0.03 | <0.001 |
|  | TWIK-2m | 0.45 ± 0.06 | <0.001 |
|  | TASK-3 | 0.2 ± 0.04 | <0.001 |
|  | THIK-1 | 0.91 ± 0.05 | 0.15 |
|  | BKα | 20.41 ± 2.39 | <0.001 |
|  | BKα/β1 | 24.42 ± 3.85 | <0.001 |
|  | Kv1.1 | 1.16 ± 0.13 | 0.25 |
|  | Kv1.3 | 0.4 ± 0.04 | <0.001 |
|  | Kv11.1 (hERG) | 0.84 ± 0.07 | 0.15 |
|  | Kir 1.1 (ROMK) | 0.8 ± 0.09 | 0.15 |
|  | Kir 2.1 | 0.68 ± 0.04 | <0.001 |

Table S2: Current fold change (I/I0) ± SEM for application of different Mangostin compounds/ formulations on TREK-1 and BK channels compared to α-Mangostin. One-way ANOVA with Dunnett’s multiple comparisons post-hoc test for each group (α=0.05); for TREK-1 F=0.196, P=0.82; for BKα F=7.65, P=0.001; for BKα/β1 F=0.903, P=0.42.

| Fig. 1D |  | Fold Change (I/I0) at +40 mV | | |  | Adjusted P values | |
| --- | --- | --- | --- | --- | --- | --- | --- |
|  |  | α-Mangostin | γ-Mangostin | Dietary suppl. |  | γ-Mangostin | Dietary suppl. |
|  | TREK-1 | 10.3 ± 1.64 | 11.35 ± 1 | 9.18 ± 2.74 |  | 0.87 | 0.94 |
|  | BKα | 20.41 ± 2.39 | 38.54 ± 4.8 | 19.98 ± 2.99 |  | 0.001 | >0.99 |
|  | BKα/β1 | 24.42 ± 3.85 | 29.32 ± 5.03 | 20.92 ± 3.49 |  | 0.66 | 0.83 |

Table S3: Comparison of the V½ ± SEM and slope ± SEM of the GV-relationship (Boltzmann fit) before and after activation by 10 µM α-Mangostin in BKα and BKα/β1 channels. V½: paired t-test, two-tailed P value (α=0.05); slope: Wilcoxon matched-pairs signed rank test, two-tailed exact P value (α=0.05).

| **Fig. 2B** | **V½ (mV)** | | **Δ V½ (mV)** | **P value** | **slope** **(mV)** | | **P value** |
| --- | --- | --- | --- | --- | --- | --- | --- |
|  | basal | 10 µM α-Mangostin |  |  | basal | 10 µM α-Mangostin |  |
| BKα | 110.49 ± 2.69 | 57.37 ± 3.60 | 53.08 ± 4.9 | <0.001 | 25.9 ± 1.33 | 21.8 ± 1.08 | 0.06 |
| BKα/β1 | 147.25 ± 5.66 | 64.83 ± 4.25 | 82.42 ± 4.96 | <0.001 | 28.8 ± 1.19 | 28.4 ± 3.24 | 0.84 |

Table S4: Comparison of activation and deactivation time constants (τ) of BKα and BKα/β1 channels in the absence and after application of 10 µM α-Mangostin (mean ± SEM). Paired t-tests, two-tailed P values (α=0.05).

| Fig. 2C | BKα | |  | BKα/β1 | |
| --- | --- | --- | --- | --- | --- |
|  | Activation +100 mV | Deactivation +100 mV |  | Activation +100 mV | Deactivation +100 mV |
| basal | 7.96 ± 1.64 ms | 0.90 ± 0.04 ms |  | 63.76 ± 16.03 ms | 3.60 ± 0.16 ms |
| 10 µM α-Mangostin | 4.71 ± 0.71 ms | 6.85 ± 1.11 ms |  | 12.36 ± 1.20 ms | 95.6 ± 13.99 ms |
| P value | 0.02 | 0.002 |  | 0.02 | 0.001 |

Table S5: Activation (n=7) and deactivation (n=6) time constants (τ) of BKα channels measured in 10 µM free Cai2+ for example voltages in the physiological range in the absence and after application of 10 µM α-Mangostin (mean ± SEM). Paired t-tests, two-tailed P values (α=0.05).

| Fig. 2 S1 | Activation τ | |  | | Deactivation τ | |
| --- | --- | --- | --- | --- | --- | --- |
|  | activation +20 mV |  | | prepulse +20 mV | |
| basal | 12.2 ± 0.6 ms |  | | 1.02 ± 0.21 ms | |
| 10 µM α-Mangostin | 4.98 ± 1.6 ms |  | | 5.59 ± 1.03 ms | |
| P value | 0.003 |  | | 0.006 | |

Table S6: Shift of voltage activation ± SEM in BKα channels in different free Ca2+ concentrations. Difference of shifts in V½ ± SEM in higher Ca2+ concentrations compared to 0.1 µM Ca2+ were tested with the Kruskal-Wallis test (α=0.05).

| **Fig. 2D** | **free Ca2+ (µM)** | **V½ (mV)** | **V½ (mV) in 10 µM α-Mangostin** | **Δ V½ (mV)** | **Exact P value** |
| --- | --- | --- | --- | --- | --- |
|  | 0.1 | 110.49 ± 2.69 | 57.37 ± 3.60 | 53.08 ± 4.9 | - |
| 1 | 91.17 ± 4.20 | 7.85 ± 6.6 | 82.74 ± 10.17 | 0.02 |
| 10 | 13.9 ± 2.52 | -36.65 ± 8.13 | 50.55 ± 9.13 | >0.99 |

Table S7: Single channel analysis of BKa channels measured in excised inside-out patches from HEK293 cells. Unpaired t-tests, two-tailed P values (α=0.05).

| Fig. 3B, C | Open probability | Amplitude (pA) | Open Dwell time (ms) | Closed Dwell time (ms) | |
| --- | --- | --- | --- | --- | --- |
| basal | 0.002 ± 0.0008 | 9.18 ± 0.29 | -0.84 ± 0.45 | | 2.38 ± 0.23 |
| 10 µM α-Mangostin | 0.77 ± 0.08 | 9.76 ± 0.26 | 0.80 ± 0.24 | | -1.39 ± 0.36 |
| P value | <0.001 | 0.18 | 0.002 | | <0.001 |

Table S8: Burst analysis of single BKa channels measured in excised inside-out patches from HEK293 cells in 5 µM free Cai2+. Mean of means from Fig. 3E are presented (n=3 patches). Unpaired t-tests, two-tailed P values (α=0.05).

| Fig. 3E, F | Burst duration (ms) | Long closures (ms) | Openings/ burst | Intraburst closed time (ms) | Intraburst open time (ms) |
| --- | --- | --- | --- | --- | --- |
| basal | 6383 ± 2095 | 7423 ± 1855 | 316.8 ± 62.5 | 20.79 ± 1.15 | 18.62 ± 1.23 |
| 10 µM α-Mangostin | 27429 ± 12017 | 3553 ± 1412 | 536.6 ± 159 | 29.44 ± 1.26 | 28.91 ± 1.18 |
| P value | n.d. | n.d. | n.d. | <0.001 | <0.001 |

Table S9: TPA IC50 ± SEM values in the absence and presence of α-Mangostin for the competition experiment in TREK-1 channels. An unpaired t-test was used to test for difference to TPA alone (two-tailed P value, α=0.05).

| **Fig. 4 S1B** | **TPA IC50 (µM)** | **P value** |
| --- | --- | --- |
| TPA | 0.72 ± 0.64 | - |
| TPA + 5 µM α-Mangostin | 6.33 ± 0.86 | 0.002 |

Table S10: Current fold change ± SEM (I/I0) after application of 5 µM α-Mangostin to cysteine mutants in the M2 and M4 segment of TREK-1 channels. Brown-Forsythe and Welsh ANOVA with Welch’s correction, α=0.05, F (DFn, DFd) = 10.68 (10, 35.84), W (DFn, DFd) = 12.19 (10, 30.22) was used to test for differences to the WT channel after α-Mangostin application.

| **Fig. 4 S1C** | **Fold change (I/I0)** | **P value** |
| --- | --- | --- |
| TREK-1 WT | 5.36 ± 0.82 | - |
| G181C | 6.55 ± 2.03 | <0.001 |
| I182C | 1.68 ± 0.18 | 0.001 |
| P183C | 67.12 ± 14.66 | <0.001 |
| L184C | 3.79 ± 0.81 | 0.19 |
| V303C | 5.21 ± 0.84 | 0.90 |
| L304C | 2.49 ± 0.31 | 0.006 |
| S305C | 2.1 ± 0.35 | 0.003 |
| M306C | 2.31 ± 0.28 | 0.004 |
| I307C | 2.38 ± 0.5 | 0.007 |
| G308C | 1.02 ± 0.03 | <0.001 |

Table S11: Comparison of estimated THexA IC50 values from competition experiments with α-Mangostin or BC5 in BKα channels. Kruskal-Wallis test with Dunn’s post-hoc test (α=0.05).

| **Fig. 4A** | **THexA IC50 of BKα channels (nM)** | **Adjusted P value** |
| --- | --- | --- |
| THexA | 77.51 ± 5.53 | - |
| THexA + 10 µM α-Mangostin | 1642.29 ± 577.82 | 0.04 |
| THexA + 100 µM BC5 | 45.6 ± 8.05 | 0.31 |

Table S12: Shifts in half-maximal activation voltage (V½)in the BKa WT channel for 10 µM α-Mangostin applied at different pH. Brown-Forsythe and Welch ANOVA with Dunnet’s T3 multiple comparison post-hoc test (α=0.05), F (DFn, DFd) = 25.7 (2.00, 10.7); W (DFn, DFd) = 28.9 (2.00, 8.58).

| Fig. 4C, S2 | V½ (mV) | V½ (mV) in 10 µM α-Mangostin | | Δ V½ (mV) | Adjusted P value | |
| --- | --- | --- | --- | --- | --- | --- |
| pH 8.5 | 91.49 ± 3.04 | 56.77 ± 4.06 | 75.97 ± 2.02 | | | 0.004 |
| pH 7.2 | 109.56 ± 3.02 | 55.51 ± 3.23 | 54.05 ± 4.04 | | | - |
| pH 6 | 127.61 ± 3.05 | 51.64 ± 4.23 | 34.71 ± 5.63 | | | 0.04 |

Table S13: Voltages of half-maximal activation (V½) before and after activation with 10 µM α-Mangostin and the resulting shift in V½ for WT different mutant BKα channels. Brown-Forsythe and Welsh ANOVA with Dunnet’s T3 post-hoc test (α=0.05), F (DFn, DFd) = 16.72 (6, 30.4), W (DFn, DFd) = 30.84 (6, 17.64).

| **Fig. 4D, E** | **V½ (mV)** | **V½ (mV) in  10 µM α-Mangostin** | **Δ V½ (mV)** | **Adjusted P value** |
| --- | --- | --- | --- | --- |
| BKα WT | 110.45 ± 2.69 | 57.37 ± 3.60 | 53.08 ± 4.9 | - |
| I308A | 54.45 ± 3.86 | 34.48 ± 3.81 | 19.97 ± 3.12 | <0.001 |
| L312M | 126.29 ± 6.19 | 98.39 ± 4.46 | 27.89 ± 5.42 | 0.02 |
| A316P | 85.6 ± 2.71 | 81.04 ± 3.58 | 4.56 ± 1.23 | <0.001 |
| A316G | 36.7 ± 2.96 | 13.13 ± 3.11 | 23.57 ± 2.05 | 0.002 |
| S317R | 120.57 ± 0.96 | 86.24 ± 3.41 | 34.33 ± 3.37 | 0.04 |
| Y318S | 112.87 ± 3.25 | 71.41 ± 5.63 | 41.46 ± 5.17 | 0.52 |

Table S14: Shifts in half-maximal activation voltage (V½)for 1 µM GoSlo-SR-5-6 in the BKa WT channel and I308A and A316P mutants. One-way ANOVA with Dunnet’s multiple comparison post-hoc test (α=0.05), F=6.51, F (DFn, DFd) = 2.09 (2, 17).

| **Fig. 4F** | **Channel** | **V½ (mV)** | **V½ (mV) activated** | **Δ V½ (mV)** | **Adjusted P value** |
| --- | --- | --- | --- | --- | --- |
| GoSlo-SR-5-6 (1 µM) | BKα WT | 104.17 ± 5.85 | 61.46 ± 6.35 | 42.71 ± 3.05 | - |
| A316P | 78.25 ± 6.92 | 50.86 ± 5.53 | 25.0 ± 2.81 | 0.01 |
| I308A | 53.83 ± 1.27 | 27.94 ± 4.68 | 25.89 ± 4.05 | 0.008 |

Table S15: Vehicle control (0.025 % DMSO) for BKα (n=4) and Cav1.2 channels (n=3) as mean ± SEM. Paired t-tests, two-tailed P values (α=0.05).

| **Fig. 5 S1** | **BKα** | |  | **Cav1.2** | |
| --- | --- | --- | --- | --- | --- |
|  | **V½ (mV)** | **V½ (mV) DMSO** |  | **Norm. current at 0 mV** | **Norm. current at 0 mV (DMSO)** |
|  | 66.3 ± 6.1 | 68.8 ± 5.6 |  | -0.94 ± 0.06 | -0.95 ± 0.03 |
| P-value |  | 0.45 |  |  | 0.92 |

Table S16: Contraction force of aortic preparations after application of 10 µM α-Mangostin. Kruskal-Wallis test with Dunn’s post-hoc test for multiple comparison (α=0.05).

| **Fig. 5C** | **norm. contraction force (f/fNA)** | | **Adjusted P value** |
| --- | --- | --- | --- |
|  | mean ± SEM | median |  |
| 10 µM α-Mangostin | 0.16 ± 0.08 | 0.113 | <0.001 |
| 100 nM IbTx | 1.04 ± 0.02 | 1.05 | - |
| 100 nM IbTx + 10 µM α-Mangostin | 0.78 ± 0.12 | 1.02 | 0.74 |
